# Supplementary material
Source: MDPI journal article supplement (https://www.mdpi.com/2304-6740/11/7/291)
Supplement: s1 [file s1]

## Supporting Information

# Synthesis, luminescence and energy transfer properties of $\text{Ce}^{3+}/\text{Mn}^{2+}$ co-doped $\text{CaCN}_2$ phosphors

Erwan Leysour de Rohello <sup>1</sup>, Yan Suffren <sup>1</sup>, Francis Gouttefangeas <sup>2</sup>, Odile Merdrignac-Conanec <sup>1</sup>, Olivier Guillou <sup>1</sup> and François Cheviré <sup>1,\*</sup>

<sup>1</sup> Univ Rennes 1, INSA Rennes, CNRS, ISCR (Institut des Sciences chimiques de Rennes) – UMR 6226, F-35000 Rennes, France

<sup>2</sup> Univ Rennes 1, CNRS, ScanMAT – UAR 2025, F-35000 Rennes, France

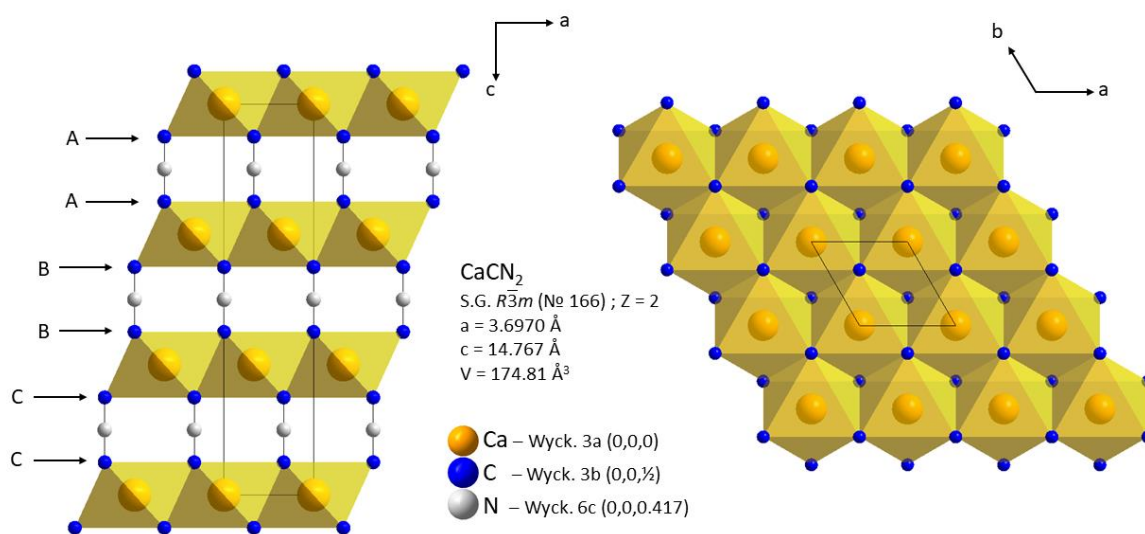

**Figure S1.** Crystal structure of  $\text{CaCN}_2$ .

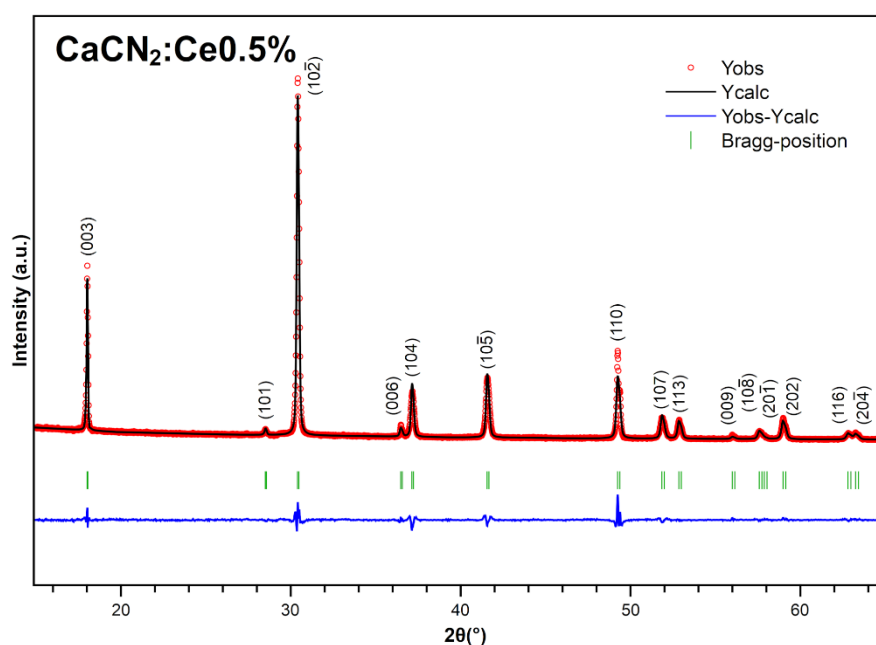

**Figure S2.** Final Rietveld refinement pattern for  $\text{Ca}_{0.995}\text{Ce}_{0.005}\text{CN}_2$ : observed (red dotted line), calculated (black full line) and difference (blue line) X-ray powder diffraction profiles from the pattern matching plot obtained with Fullprof.

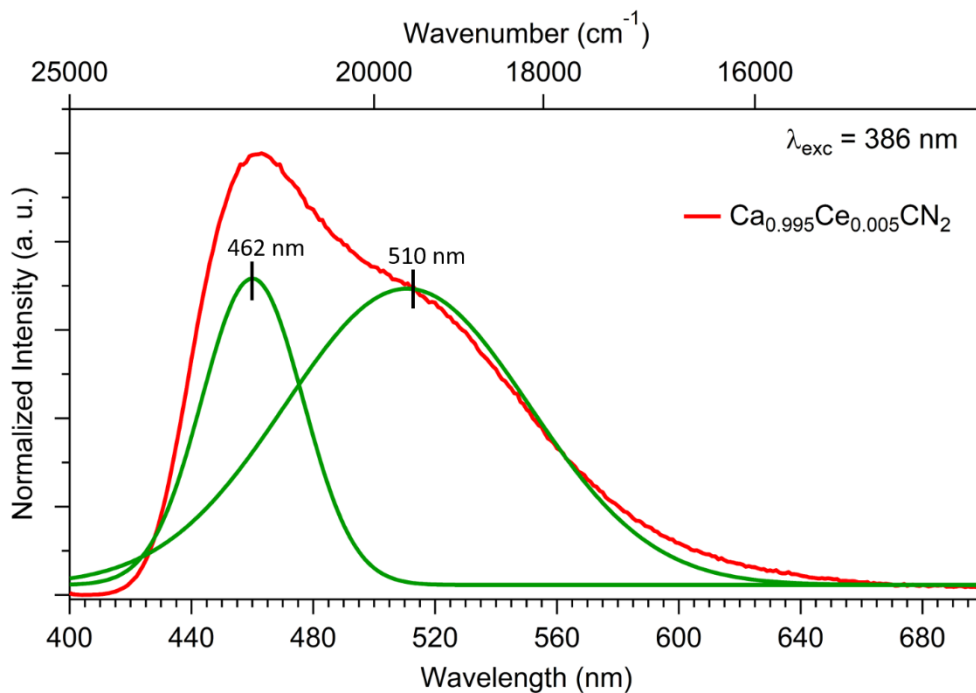

Figure S3. Deconvolution of the double emission band of  $\text{Ca}_{0.995}\text{Ce}_{0.005}\text{CN}_2$ .

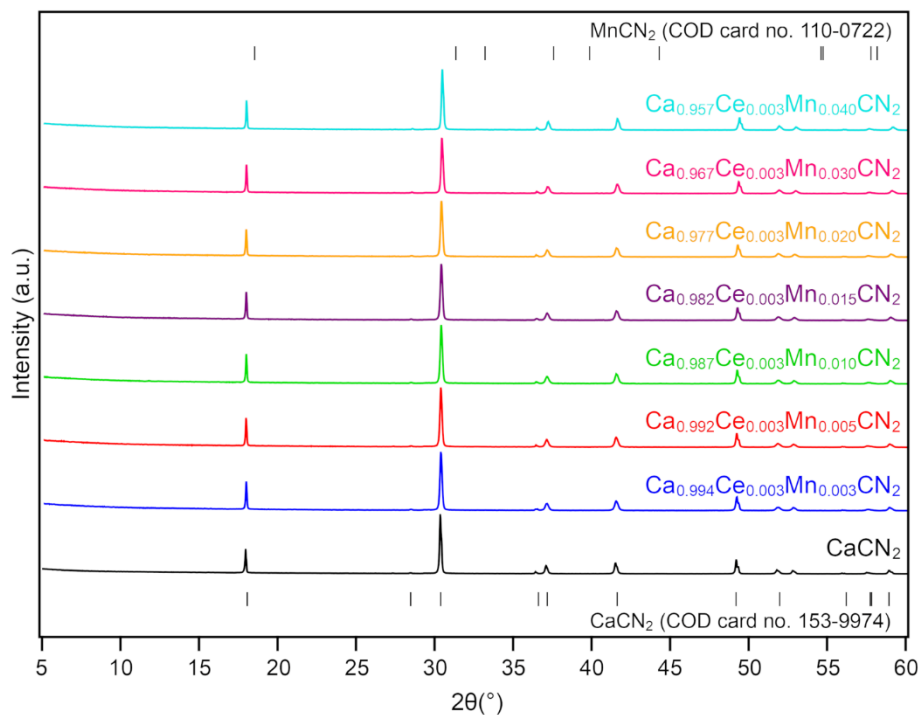

Figure S4. Powder X-ray diffraction diagrams of  $\text{Ca}_{0.997-y}\text{Ce}_{0.003}\text{Mn}_y\text{CN}_2$  ( $0.003 \leq y \leq 0.04$ ) samples.

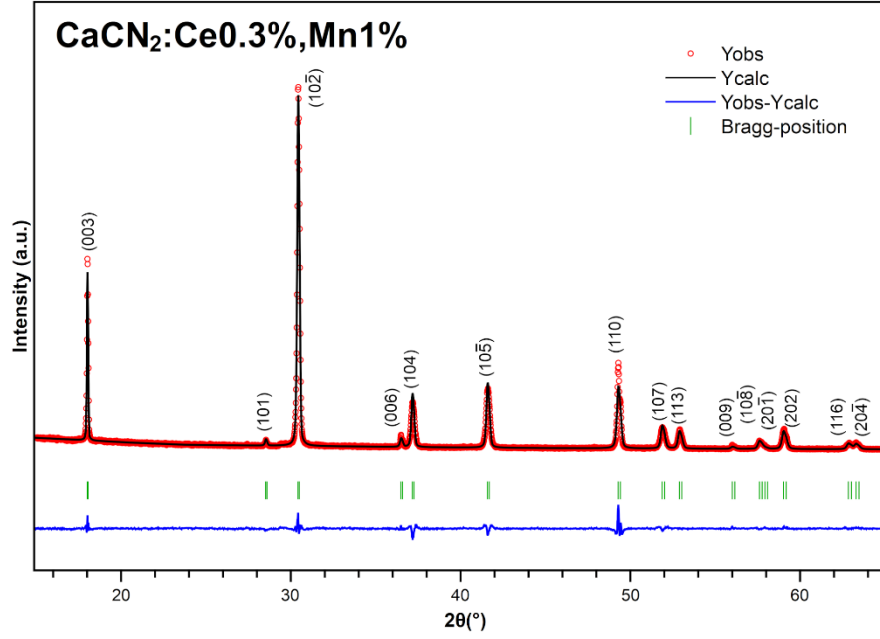

**Figure S5.** Final Rietveld refinement pattern for  $\text{Ca}_{0.995}\text{Ce}_{0.003}\text{Mn}_{0.010}\text{CN}_2$ : observed (red dotted line), calculated (black full line) and difference (blue line) X-ray powder diffraction profiles from the pattern matching plot obtained with Fullprof.

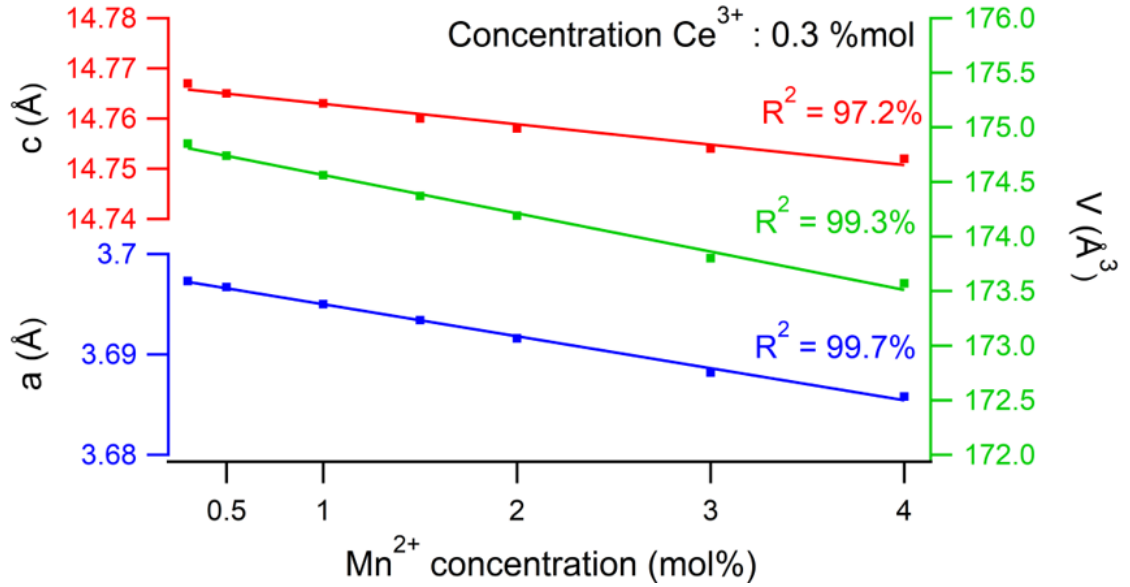

**Figure S6.** Evolution of the unit cell parameters ( $a$ ,  $c$ ) and cell volume ( $V$ ) in  $\text{Ca}_{0.997-y}\text{Ce}_{0.003}\text{Mn}_y\text{CN}_2$  ( $0.003 \leq y \leq 0.04$ ) samples versus  $\text{Ce}^{3+}$  doping concentration. The linear decrease of the cell parameters ( $a$ ,  $c$  and  $V$ ) of the  $\text{Ca}_{0.997-y}\text{Ce}_{0.003}\text{Mn}_y\text{CN}_2$  ( $0.003 \leq y \leq 0.04$ ) samples follows Vegard's law and confirms the insertion of  $\text{Mn}^{2+}$  within the structure of the host material  $\text{CaCN}_2$  as  $\text{Mn}^{2+}$  activator has a lower radius ( $r_{\text{Mn}^{2+}} = 0.66 \text{ \AA}$ ) than  $\text{Ca}^{2+}$  ( $r_{\text{Ca}^{2+}} = 1.0 \text{ \AA}$ ) in octahedral coordination.

**Table S1.** Details of the Rietveld refinement of the XRD diagrams of the  $\text{Ca}_{1-x}\text{Ce}_x\text{CN}_2$  samples.

| $\text{Ce}^{3+}$ (%)                                         | 0         | 0.3        | 0.5        | 1          | 1.5        | 2          | 3         | 4         |
|--------------------------------------------------------------|-----------|------------|------------|------------|------------|------------|-----------|-----------|
| <b>Space group, Z</b> Rhombohedral, $R\bar{3}m$ (No. 166), 3 |           |            |            |            |            |            |           |           |
| <b>Lattice parameters</b>                                    |           |            |            |            |            |            |           |           |
| $a$ (Å)                                                      | 3.6970(1) | 3.6978(2)  | 3.6978(2)  | 3.6983(1)  | 3.6986(2)  | 3.6993(1)  | 3.7000(2) | 3.6996(3) |
| $c$ (Å)                                                      | 14.767(1) | 14.7688(9) | 14.7690(9) | 14.7725(8) | 14.7728(8) | 14.7740(9) | 14.774(1) | 14.775(1) |
| $V$ (Å <sup>3</sup> )                                        | 174.81(2) | 174.89(1)  | 174.90(2)  | 174.99(1)  | 175.02(2)  | 175.10(1)  | 175.17(2) | 175.14(2) |
| <b>Figure of merits</b>                                      |           |            |            |            |            |            |           |           |
| $R_p$ (%)                                                    | 16.3      | 16.7       | 16.3       | 16.0       | 17.0       | 18.2       | 22.5      | 25.7      |
| $R_{wp}$ (%)                                                 | 16.6      | 16.8       | 16.4       | 15.6       | 16.2       | 16.3       | 18.5      | 21.2      |
| $R_{exp}$ (%)                                                | 9.05      | 9.24       | 9.16       | 9.24       | 9.48       | 9.86       | 10.6      | 11.0      |
| $R_{bragg}$                                                  | 3.20      | 3.27       | 3.35       | 3.52       | 3.78       | 3.80       | 4.27      | 4.66      |
| $\chi^2$                                                     | 3.37      | 3.29       | 3.19       | 2.86       | 2.90       | 2.74       | 3.02      | 3.69      |

**Table S2.** Occupied Wyckoff sites, refined atomic coordinates (in Å), isotropic atomic displacement parameters  $B_{iso}$  (in Å<sup>2</sup>) and site occupancies of Ca<sub>1-x</sub>Ce<sub>x</sub>CN<sub>2</sub> samples (standard deviation in parentheses).

| <i>Atom</i>                                               | <i>Position</i> | <i>x</i> | <i>y</i> | <i>z</i>  | <i>B<sub>iso</sub></i> (Å <sup>2</sup> ) | <i>Occupation</i> |
|-----------------------------------------------------------|-----------------|----------|----------|-----------|------------------------------------------|-------------------|
| <i>Ca<sub>0.997</sub>Ce<sub>0.003</sub>CN<sub>2</sub></i> |                 |          |          |           |                                          |                   |
| <i>Ca</i>                                                 | <i>3b</i>       | 0        | 0        | 0         | 0.88(9)                                  | 0.997             |
| <i>Ce</i>                                                 | <i>3b</i>       | 0        | 0        | 0         | 0.88(9)                                  | 0.003             |
| <i>C</i>                                                  | <i>3a</i>       | 0        | 0        | 0.5       | 0.8(2)                                   | 1                 |
| <i>N</i>                                                  | <i>6c</i>       | 0        | 0        | 0.4162(3) | 0.8(1)                                   | 1                 |
| <i>Ca<sub>0.995</sub>Ce<sub>0.005</sub>CN<sub>2</sub></i> |                 |          |          |           |                                          |                   |
| <b>Ca</b>                                                 | <i>3b</i>       | 0        | 0        | 0         | 0.87(8)                                  | 0.995             |
| <b>Ce</b>                                                 | <i>3b</i>       | 0        | 0        | 0         | 0.83(8)                                  | 0.005             |
| <b>C</b>                                                  | <i>3a</i>       | 0        | 0        | 0.5       | 0.9(2)                                   | 1                 |
| <b>N</b>                                                  | <i>6c</i>       | 0        | 0        | 0.4164(3) | 0.7(1)                                   | 1                 |
| <i>Ca<sub>0.99</sub>Ce<sub>0.01</sub>CN<sub>2</sub></i>   |                 |          |          |           |                                          |                   |
| <i>Ca</i>                                                 | <i>3b</i>       | 0        | 0        | 0         | 0.93(8)                                  | 0.99              |
| <i>Ce</i>                                                 | <i>3b</i>       | 0        | 0        | 0         | 0.93(8)                                  | 0.01              |
| <i>C</i>                                                  | <i>3a</i>       | 0        | 0        | 0.5       | 1.0(2)                                   | 1                 |
| <i>N</i>                                                  | <i>6c</i>       | 0        | 0        | 0.4162(3) | 1.0(1)                                   | 1                 |
| <i>Ca<sub>0.985</sub>Ce<sub>0.015</sub>CN<sub>2</sub></i> |                 |          |          |           |                                          |                   |
| <i>Ca</i>                                                 | <i>3b</i>       | 0        | 0        | 0         | 0.87(9)                                  | 0.985             |
| <i>Ce</i>                                                 | <i>3b</i>       | 0        | 0        | 0         | 0.87(9)                                  | 0.015             |
| <i>C</i>                                                  | <i>3a</i>       | 0        | 0        | 0.5       | 0.9(2)                                   | 1                 |
| <i>N</i>                                                  | <i>6c</i>       | 0        | 0        | 0.4163(3) | 0.9(2)                                   | 1                 |
| <i>Ca<sub>0.98</sub>Ce<sub>0.02</sub>CN<sub>2</sub></i>   |                 |          |          |           |                                          |                   |
| <i>Ca</i>                                                 | <i>3b</i>       | 0        | 0        | 0         | 0.86(9)                                  | 0.98              |
| <i>Ce</i>                                                 | <i>3b</i>       | 0        | 0        | 0         | 0.86(9)                                  | 0.02              |
| <i>C</i>                                                  | <i>3a</i>       | 0        | 0        | 0.5       | 0.9(2)                                   | 1                 |
| <i>N</i>                                                  | <i>6c</i>       | 0        | 0        | 0.4165(3) | 0.8(1)                                   | 1                 |
| <i>Ca<sub>0.97</sub>Ce<sub>0.03</sub>CN<sub>2</sub></i>   |                 |          |          |           |                                          |                   |
| <i>Ca</i>                                                 | <i>3b</i>       | 0        | 0        | 0         | 0.8(1)                                   | 0.97              |
| <i>Ce</i>                                                 | <i>3b</i>       | 0        | 0        | 0         | 0.8(1)                                   | 0.03              |
| <i>C</i>                                                  | <i>3a</i>       | 0        | 0        | 0.5       | 0.6(3)                                   | 1                 |
| <i>N</i>                                                  | <i>6c</i>       | 0        | 0        | 0.4168(3) | 0.6(2)                                   | 1                 |
| <i>Ca<sub>0.96</sub>Ce<sub>0.04</sub>CN<sub>2</sub></i>   |                 |          |          |           |                                          |                   |
| <i>Ca</i>                                                 | <i>3b</i>       | 0        | 0        | 0         | 0.9(1)                                   | 0.96              |
| <i>Ce</i>                                                 | <i>3b</i>       | 0        | 0        | 0         | 1.0(1)                                   | 0.04              |
| <i>C</i>                                                  | <i>3a</i>       | 0        | 0        | 0.5       | 0.7(2)                                   | 1                 |
| <i>N</i>                                                  | <i>6c</i>       | 0        | 0        | 0.4165(5) | 0.5(2)                                   | 1                 |

**Table S3.** Details of the Rietveld refinement of the XRD diagrams of the  $\text{Ca}_{0.997-y}\text{Ce}_{0.003}\text{Mn}_y\text{CN}_2$  ( $0.003 \leq y \leq 0.04$ ) samples.

| Ce <sup>3+</sup> (%)        | 0.3                                    |           |           |           |           |           |           |
|-----------------------------|----------------------------------------|-----------|-----------|-----------|-----------|-----------|-----------|
| Mn <sup>2+</sup> (%)        | 0.3                                    | 0.5       | 1         | 1.5       | 2         | 3         | 4         |
| Space group, Z              | Rhombohedral, $R\bar{3}m$ (No. 166), 3 |           |           |           |           |           |           |
| Lattice parameters          |                                        |           |           |           |           |           |           |
| <i>a</i> (Å)                | 3.6973(2)                              | 3.6967(2) | 3.6950(2) | 3.6934(2) | 3.6916(2) | 3.6882(1) | 3.6858(1) |
| <i>c</i> (Å)                | 14.767(1)                              | 14.765(1) | 14.762(1) | 14.759(1) | 14.758(1) | 14.753(1) | 14.753(8) |
| <i>V</i> (Å <sup>3</sup> )  | 174.8(2)                               | 174.7(2)  | 174.5(2)  | 174.3(2)  | 174.2(2)  | 173.8(1)  | 173.6(1)  |
| Figure of merits            |                                        |           |           |           |           |           |           |
| <i>R</i> <sub>p</sub> (%)   | 17.8                                   | 17.9      | 17.9      | 17.9      | 18.4      | 18.3      | 16.7      |
| <i>R</i> <sub>wp</sub> (%)  | 17.5                                   | 17.7      | 17.8      | 17.6      | 17.7      | 17.2      | 15.4      |
| <i>R</i> <sub>exp</sub> (%) | 11.4                                   | 11.4      | 11.4      | 11.6      | 11.8      | 11.9      | 11.7      |
| <i>R</i> <sub>bragg</sub>   | 3.68                                   | 3.63      | 3.76      | 3.71      | 3.67      | 4.01      | 3.06      |
| χ <sup>2</sup>              | 2.35                                   | 2.43      | 2.45      | 2.30      | 2.26      | 2.08      | 1.74      |

**Table S4.** Chemical composition and  $\text{Ce}^{3+}$ ,  $\text{Mn}^{2+}$  contents of  $\text{Ca}_{0.997-y}\text{Ce}_{0.003}\text{Mn}_y\text{CN}_2$  ( $0.003 \leq y \leq 0.04$ ) samples obtained using EDS and the inert gas fusion technique. The amounts of  $\text{Ce}^{3+}$  and  $\text{Mn}^{2+}$  in all samples are in good agreement with the targeted values. The nitrogen contents are in good agreement with the calculated values while the oxygen levels do not exceed 1 wt%.

| $y$   | Ca at% | Ce at%*     | Mn at%*     | Na at% | $N_{exp}$ wt% | $N_{calc}$ wt% | $\Delta N$ %** | O wt% |
|-------|--------|-------------|-------------|--------|---------------|----------------|----------------|-------|
| 0.003 | 97.51  | 0.38 (0.38) | 0.21 (0.21) | 1.90   | 34.26         | 34.81          | 1.58           | 0.17  |
| 0.005 | 97.14  | 0.30 (0.31) | 0.48 (0.49) | 2.08   | 34.75         | 34.80          | 0.14           | 0.89  |
| 0.01  | 95.97  | 0.34 (0.35) | 1.01 (1.04) | 2.68   | 34.72         | 34.77          | 0.14           | 0.98  |
| 0.015 | 95.14  | 0.35 (0.36) | 1.57 (1.62) | 2.94   | 34.60         | 34.74          | 0.40           | 0.47  |
| 0.02  | 95.91  | 0.39 (0.40) | 2.05 (2.08) | 1.65   | 34.62         | 34.70          | 0.23           | 0.52  |
| 0.03  | 93.90  | 0.31 (0.32) | 2.98 (3.07) | 2.81   | 34.07         | 34.64          | 1.64           | 0.50  |
| 0.04  | 92.88  | 0.32 (0.33) | 3.95 (4.06) | 2.86   | 34.68         | 34.58          | 0.29           | 0.65  |

\*Values without brackets represent Mn and Ce rates taking into account Na; the values in brackets are the Mn and Ce rates recalculated without considering Na.

\*\*Deviation of the experimental nitrogen rate from the theoretical value.

**Table S5.** Chromaticity coordinates ( $x$ ,  $y$ ) of the  $\text{Ca}_{0.997-y}\text{Ce}_{0.003}\text{Mn}_y\text{CN}_2$  ( $0.003 \leq y \leq 0.04$ ) samples.

| $\text{Ce}^{3+}$ (%)            | 0.3  |      |      |      |      |      |      |      |
|---------------------------------|------|------|------|------|------|------|------|------|
| $\text{Mn}^{2+}$ (%)            | 0    | 0.3  | 0.5  | 1    | 1.5  | 2    | 3    | 4    |
| <b>Chromaticity coordinates</b> |      |      |      |      |      |      |      |      |
| $x$                             | 0.19 | 0.23 | 0.25 | 0.30 | 0.35 | 0.39 | 0.44 | 0.46 |
| $y$                             | 0.27 | 0.28 | 0.28 | 0.28 | 0.29 | 0.29 | 0.29 | 0.30 |
